# Supplementary material for: The mental health of unemployed Brussels youth: the role of social and material resources
Source: Springer Nature journal article supplement (doi:10.1186/s13690-017-0187-7), 2017-03-09
Supplement: MOESM1 [file 12241130]

1 Table 1 PR's and 95% CI's of mental distress and a possible mental disorder in unemployed compared to  
 2 employed youth 1997-2013 in Flanders and Wallonia. HIS-sample

|                                 | <u>Wallonia</u>   |          |                 |          |                         | <u>Flanders</u>   |          |                 |          |                         |
|---------------------------------|-------------------|----------|-----------------|----------|-------------------------|-------------------|----------|-----------------|----------|-------------------------|
|                                 | <i>Unemployed</i> |          | <i>Employed</i> |          | <i>PR (CI)</i>          | <i>Unemployed</i> |          | <i>Employed</i> |          | <i>PR (CI)</i>          |
| <b>Mental distress</b>          | <i>N</i>          | <i>%</i> | <i>N</i>        | <i>%</i> |                         | <i>N</i>          | <i>%</i> | <i>N</i>        | <i>%</i> |                         |
| <b>1997</b>                     | 37                | 44.58    | 86              | 30.28    | <b>1.47 (1.09-1.98)</b> | 17                | 29.82    | 98              | 26.85    | 1.11 (0.72-1.71)        |
| <b>2001</b>                     | 25                | 37.31    | 112             | 33.84    | 1.10 (0.78-1.56)        | 8                 | 29.63    | 90              | 23.08    | 1.28 (0.70-2.36)        |
| <b>2004</b>                     | 33                | 44.00    | 87              | 30.85    | <b>1.43 (1.05-1.94)</b> | 12                | 41.38    | 71              | 20.70    | <b>2.00 (1.24-3.32)</b> |
| <b>2008</b>                     | 36                | 45.57    | 63              | 29.86    | <b>1.53 (1.11-2.10)</b> | 9                 | 40.91    | 53              | 20.95    | <b>1.95 (1.12-3.41)</b> |
| <b>2013</b>                     | 24                | 44.44    | 45              | 26.16    | <b>1.70 (1.15-2.51)</b> | 6                 | 46.15    | 46              | 28.40    | 1.63 (0.86-3.07)        |
| <b>Possible mental disorder</b> | <i>N</i>          | <i>%</i> | <i>N</i>        | <i>%</i> | <i>PR (CI)</i>          | <i>N</i>          | <i>%</i> | <i>N</i>        | <i>%</i> | <i>PR (CI)</i>          |
| <b>1997</b>                     | 23                | 27.71    | 41              | 14.44    | <b>1.92 (1.23-3.01)</b> | 9                 | 15.79    | 48              | 13.15    | 1.20 (0.62-2.31)        |
| <b>2001</b>                     | 15                | 22.39    | 54              | 16.31    | 1.37 (0.83-2.28)        | 7                 | 25.93    | 43              | 11.03    | <b>2.35 (1.17-4.72)</b> |
| <b>2004</b>                     | 16                | 21.33    | 37              | 13.12    | 1.63 (0.96-2.76)        | 6                 | 20.69    | 36              | 10.50    | 1.97 (0.91-4.29)        |
| <b>2008</b>                     | 25                | 31.65    | 26              | 12.32    | <b>2.57 (1.58-4.17)</b> | 7                 | 31.82    | 20              | 7.91     | <b>4.03 (1.92-8.46)</b> |
| <b>2013</b>                     | 12                | 22.22    | 19              | 11.05    | <b>2.01 (1.05-3.87)</b> | 5                 | 38.46    | 21              | 12.96    | <b>2.97 (1.34-6.57)</b> |

3 PR (CI) in bold equals significant according to the p<0.05 threshold

4
